# Supplementary material for: Enhanced stability of nitrogen doped porous carbon fiber on cathode materials for high performance lithium–sulfur batteries
Source: Royal Society of Chemistry journal article supplement (doi:10.1039/d2ra03317h), 2022-01-01
Supplement: d2ra03317h1.pdf [file d2ra03317h1.pdf]

## Supporting Information

### **Enhanced stability of nitrogen doped porous carbon fiber on cathode materials for high performance lithium-sulfur batteries**

Xi Wu<sup>a</sup>, Xiaohua Jie<sup>a</sup>, Xinghua Liang<sup>b,d,\*</sup>, Suo Li<sup>b</sup>, Lingxiao Lan<sup>b,d</sup>, Dan Xie<sup>e</sup>, Yusi Liu<sup>c\*</sup>

<sup>a</sup>School of Materials and Energy, Guangdong University of Technology, Guangzhou 510006, China;

<sup>b</sup>Guangxi Key Laboratory of Automobile Components and Vehicle Technology, Guangxi University of Science & Technology, Liuzhou 545006, P. R.China;

<sup>c</sup>College of Smart Energy, Shanghai Jiao Tong University, Shanghai 200240, P. R.China.

<sup>d</sup>National Engineering Laboratory for Modern Materials Surface Engineering Technology, Guangdong Institute of New Materials, Guangdong Academy of Science, Guangzhou 510650, P. R.China;

<sup>e</sup>Dongfeng Xiaokang Moto Co.,Ltd, Shiyuan 442000, P. R.China.

\*E-mail: [309602373@qq.com](mailto:309602373@qq.com)(Xinghua Liang), [Yusiliu@sjtu.edu.cn](mailto:Yusiliu@sjtu.edu.cn)(Yusi Liu)

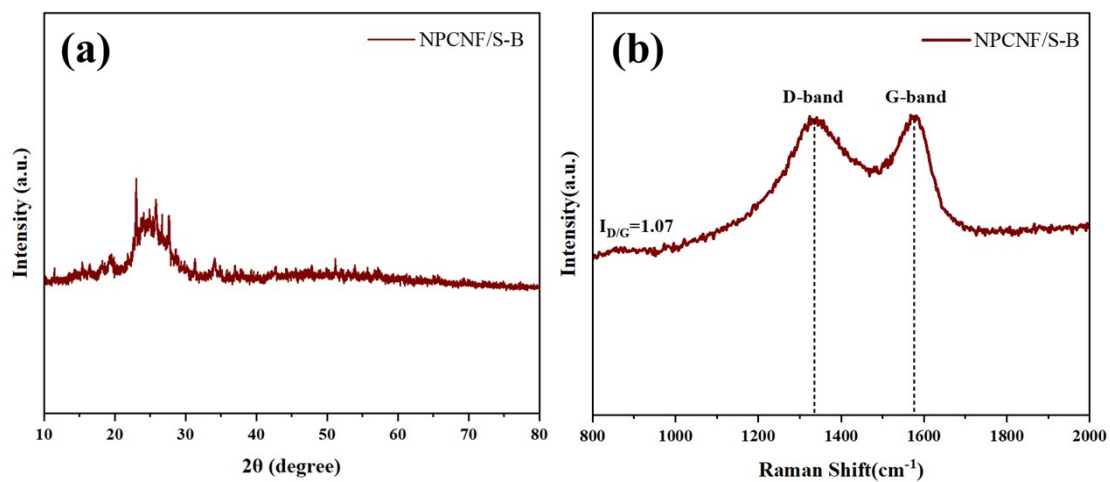

**Figure S1.** (a) XRD pattern and (b) Raman spectra of NPCNF/S-B.

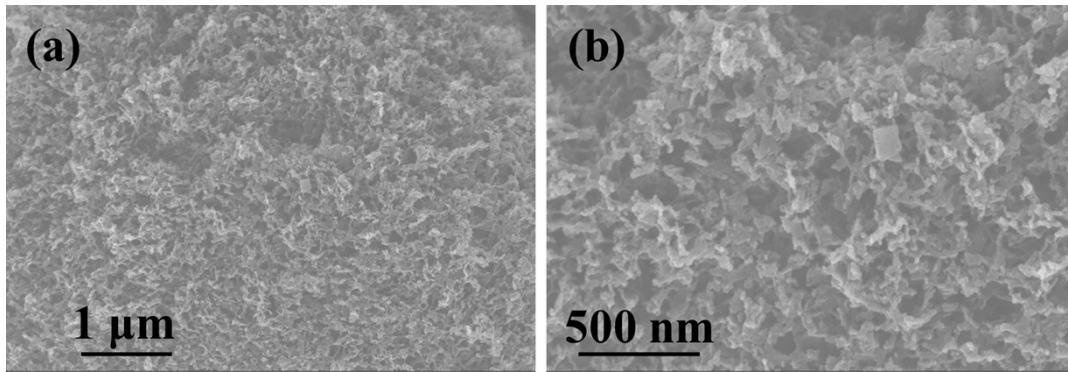

**Figure S2.** (a) Low and (b) high-magnification SEM images of NPCNF/S-B.

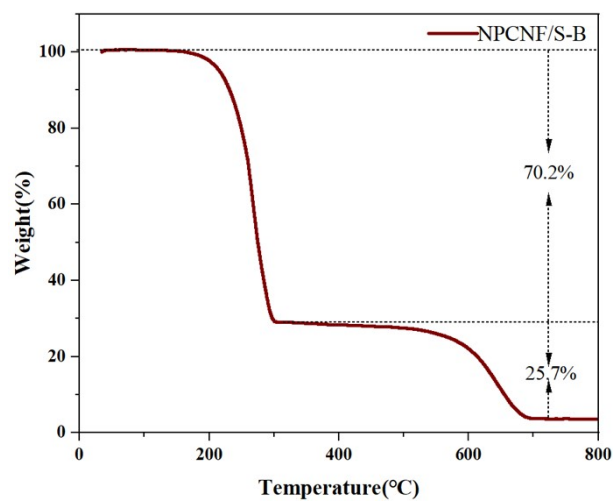

**Figure S3.** TGA curve of NPCNF/S-B at 10 °C min<sup>-1</sup> in air atmosphere.

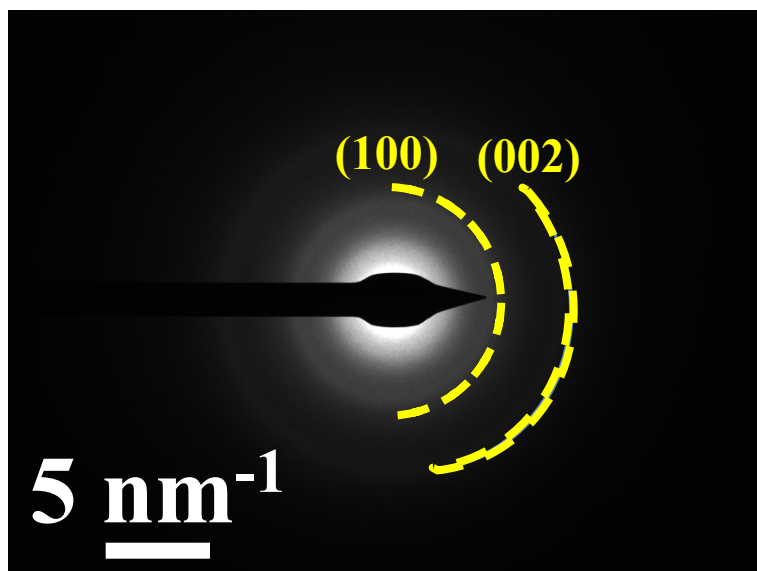

**Figure S4.** The SAED pattern of area 2 in Figure 5.
